1 Immunomodulatory activity of *Momordica charantia* L. (*Cucurbitaceae*) leaf diethyl ether  
2 and methanol extracts on *Salmonella typhi* infected mice and LPS-induced phagocytic  
3 activities of macrophages and neutrophils

4 OUMAR Mahamat<sup>1&</sup>, Hakoueu N. Flora <sup>2</sup> TUME Christopher<sup>3</sup> and KAMANYI Albert<sup>4</sup>

5 <sup>1.</sup> OUMAR Mahamat<sup>&</sup>, Department of Biological Sciences, Faculty of Science, University of  
6 Bamenda, Cameroon, E-mail: [oumahamat@yahoo.com](mailto:oumahamat@yahoo.com)

7 <sup>2.</sup> Hakoueu N. Flora, Animal Reproduction Physiology Laboratory, Institute of Agricultural  
8 Research for Development (IRAD) Bambui, Cameroon, E-mail: [hakoueu@yahoo.fr](mailto:hakoueu@yahoo.fr)

9 <sup>3.</sup> TUME Christopher, Department of Biochemistry, Faculty of Science, University of  
10 Dschang, Cameroon, E-mail: [tumechrist@yahoo.com](mailto:tumechrist@yahoo.com)

11 <sup>4.</sup> KAMANYI Albert, Faculty of Health Sciences, Université des Montagnes, Cameroon, E-  
12 mail: [bettykama@outlook.com](mailto:bettykama@outlook.com)

13 **&Corresponding Author:** Department of Biological Sciences, Faculty of Science, University  
14 of Bamenda, Cameroon. P.O Box 39 Bambili, E-mail: [oumahamat@yahoo.com](mailto:oumahamat@yahoo.com), Tel.  
15 00237-676-56-97-18

16 **Short title:** *Momordica charantia* and immune response against *Salmonella typhi*

17 **Abstract**

18 Infections due to *salmonella* strains constitute one of the major health problems in  
19 humans, particularly in Africa. Use of traditional herbs has proven effective in reducing the  
20 incidence of infection in some high-risk groups. To assess the effects of *Momordica charantia*  
21 leaf extracts that influence blood infestation, *in vitro* study of the effect on macrophages and  
22 neutrophils, and treatment of mouse model of *S. typhi* infection was done. Methanol and  
23 diethyl ether extracts were concerned by this study. *In vitro* study was to assess the effects of  
24 extracts on phagocytosis and related intracellular killing mechanisms of macrophages were  
25 examined. Later, mobilization of leukocytes and production of antibodies against *S. typhi*  
26 were measured followed by quantitating cultures evaluation of the blood infestation of orally  
27 inoculated mice with *S. typhi*. Ingestion or attachment of carbon particles, production of  
28 superoxide anion, nitric oxide and that of lysosomal acid phosphatase by macrophages and  
29 neutrophils were significantly increased by methanol and diethyl extracts at concentrations  
30 ranging from 40 µg/ml to 640 µg/ml. Antibody titer and mobilization of leukocytes,  
31 particularly lymphocytes against *S. typhi* were highly increased by both methanol and diethyl  
32 extracts at concentrations of 500 and 1000 mg/kg. In the same the extracts have reduced the  
33 rate of blood infestation in mice inoculated with 10<sup>8</sup> CFU of *S. typhi* for 28 days. Reduction in  
34 blood infestation rates was similar for levamisole mice group. Results of this study should  
35 prove useful of leave of *Momordica charantia* for treatment of infections by *salmonella*  
36 strains and for assessment of drugs for therapeutic intervention.

37 **Keywords:** *Momordica charantia*; Phagocytosis; antibody response; Leukocytes mobilization;  
38 Salmonellosis

## 40 **Background**

41 The immune system has a fundamental role in protecting the body against pathogenic  
42 microbial agents [1]. Once activated, the immune system produces immediate response by the  
43 activation of immune component cells and production of various cytokines, chemokines and  
44 inflammatory mediators. In several conditions, the system is a target of a numerous drugs and  
45 herbs known as immunomodulators act by achieving immunostimulation (as in the treatment  
46 of AIDS) or achieving immunosuppression (e.g. the treatment of autoimmune disease) [2].

47 *Salmonella* infections are extremely common in the Cameroon. Frequently  
48 asymptomatic, salmonellosis imposes costs upon the public sector, on industry, in particular  
49 the wholesale and retail food industry, and very importantly upon the infected person and  
50 their family. Given both the wide distribution of *Salmonella* in foodstuffs and the frequency  
51 of asymptomatic *Salmonella* carriage, it is difficult to envision how any restaurant might  
52 prevent the occasional case of *Salmonella* transmission despite emphasis on hygienic  
53 practices. *Salmonella* infection is therefore a risk of everyday life, especially for persons who  
54 dine out frequently. As in all diseases, containment of *Salmonella* infection depends on an  
55 intact T-lymphocyte system including macrophage function. Persons with impaired T-cell  
56 function because of lymphoproliferative disorders, or immunosuppressive medication and  
57 persons with disorders that cause “macrophage blockade” such as hemoglobinopathies,  
58 malaria, schistosomiasis are well known to be persons at risk of serious consequences of  
59 *Salmonella* infection.

60 Modulation of immune response to alleviate disease conditions has long been of  
61 interest and increasingly recognized as a key component of effective disease control. Plant  
62 extracts have been widely investigated in the recent time in different parts of the world for

63 their possible immunomodulatory properties [3,4]. They are very helpful in prevention of  
64 infectious diseases, or acquired immunodeficiency [5].

65 Since most of the drugs currently available for treatment of salmonellosis are toxic,  
66 costly and no longer effective, attempts are being made in laboratories around the world to  
67 discover new, safer, more cost effective and more potent molecules from medicinal plants  
68 with an ethnomedical history. Many plant extracts with immunomodulatory activities can be  
69 of great help in the control of bacterial infection notably salmonellosis. Plants such as  
70 *Caesalpinia bonducella* Flem (Caesalpinaceae), *Rhododendron spiciferum* Franch  
71 (*Ericaceae*), *Curcuma longa* Linn (*Zingiberaceae*), *Azadiracta indica* A., Juss (*Meliaceae*),  
72 *Boerhaavia diffusa* Linn (*Nyctaginaceae*) and *Ocimum sanctum* Linn (*Lamiaceae*) among  
73 others, are known to possess immunomodulatory activity [6].

74 *Momordica charantia* L. (*M. charantia*), is known to have both immunosuppressive  
75 and immunostimulant activities [7]. Plant fruits were demonstrated to promote the phagocytic  
76 activity, activation of splenocytes [8-12]. Several bioactive compounds of *M. charantia* fruit  
77 have been recorded in the literature. They are classified as carbohydrates, proteins, lipids and  
78 more [13-15]. *M. charantia* contains triterpenoids [16-19], saponins [20-22], polypeptides [23],  
79 flavonoids [24], alkaloids [23] and sterols [18]. Leave of *M. charantia* are used in Cameroonian  
80 traditional medicine to treat typhoid. But, the biological activities and mode of action of the  
81 plant extracts are poorly understood and may act directly or indirectly.

82 This work was therefore designed to study the immunomodulatory activity of  
83 methanol and diethyl ether extracts of *M. charantia* leave on *Salmonella typhi* infected mice  
84 and phagocytic cells with the aim of having a better understanding of the therapeutic of *M.*  
85 *charantia* against *salmonella* strains.

## 86 ***Materials and methods***

87 *Reagents and chemical*

88 Various reagents and chemicals were used to prepare the extracts and for the assays.  
89 They include 3- (4,5-dimethylthiazol-2-yl) -2,5-diphenyl tetrazolium bromide (MTT), Roswell  
90 Park Memorial Institute (RPMI) medium, fetal bovine serum (FBS), para-  
91 nitrophenylphosphate (*P*-NPP), phosphate buffered saline (PBS), lipopolysaccharide (LPS),  
92 penicillin-streptomycin (Pen-Strep), neutral red (NR), sulfanilamide,  
93 naphthylethylenediamine dihydrochloride, dimethyl sulfoxide (DMSO), triton-100 and  
94 nitroblue tetrazolium (NBT) whose were purchased from Sigma Chemical, Germany.  
95 Methanol and diethyl ether used as solvents were obtained from Merck.

96 *Plant material*

97 Leave of *M. charantia* were collected in May 2018 from Mbui Division, North West  
98 region, Cameroon. It was identified by Dr. TACHAM Walter, a botanist at Department of  
99 Biological Sciences, University of Bamenda, Cameroon. The identification was authenticated  
100 by the national herbarium in comparison with the collected material of Letouzey R6428,  
101 where the voucher specimen is registered under the following number: N°: 8095/REF/CAM.

102 *Experimental animals*

103 Adult male out-bred albino mice (10-12 weeks old; 18–25 g) were used for the study.  
104 They were obtained from National Veterinary Laboratory, Garoua, Cameroon where they  
105 were raised under constant temperature (25-27°C) and light (12 hours light/dark). The animals  
106 were taken to the animal house of the Department of Biological Sciences, where they were  
107 given standard rodent feed and water ad libitum.

108 *Salmonella strain*

109 *Salmonella typhi* was used for this study. It was isolated from clinically sick patients.  
110 It was maintained in the Department by serial cultures in SDS medium. This organism was  
111 grown on MacConkey's agar, containing 2% agar, at 37°C. For 18 hours and harvested into  
112 sterile saline. The bacteria were washed three times in saline and finally suspended in 0.5%  
113 formalinized saline. This suspension was incubated at 37°C to kill the organisms and then  
114 tested for sterility. This sterile suspension constituted the stock antigen and was stored at 2° C.  
115 The antigens for inoculation into mice or for the agglutination test were diluted from the stock  
116 antigen with sterile saline to a density of tube of McFarlands nephelometer (10<sup>9</sup> organisms per  
117 ml).

#### 118 *Preparation of plant extracts*

119 Fresh leave of *M. charantia* were washed with distilled water and dried at 30 °C. The  
120 dried leave were ground and weighed. Subsequently, the dried powder was extracted with  
121 98% diethyl ether (ratio: 1:5) for 3 days at room temperature. The solvent-containing extract  
122 was then filtered and the filtrate was evaporated using a rotary evaporator to provide the  
123 diethyl ether extract (D-Extract). The residue was dried and extracted with 80% methanol  
124 with a ratio of 1:6. The filtrate was evaporated to provide the methanol extract (M-Extract).  
125 To further ensure that all the water was removed, the extracts were freeze dried using a dry  
126 ovum. The extract solutions were then prepared by dissolving 5 mg of extracts in the 0.25 ml  
127 DMSO and diluting with PBS to be used *in vitro* and *in vivo*.

#### 128 *Ethical consideration and blood collection*

129 Blood samples were collected from mice for experiment by cardiac puncture under  
130 anesthesia by mixture of Ketamine/Xylazine administered at 2 different doses (50 mg/kg–5  
131 mg/kg), 0.1 ml/100g b.w. intraperitoneally. Animal studies were in compliance with the

132 ethical procedures of the Animal Use and Care Committee, Faculty of Sciences, University of  
133 Bamenda, which corresponds with National Institutes of Health (NIH) guidelines [26].

#### 134 *Cell preparation*

135 Total white blood cells were obtained by collecting the plasma from heparinized mice  
136 blood and diluted in equal volume of RPMI-1640 medium. Cells were harvested after 2  
137 successive washings by centrifugation (1800 rpm, 10 min) in medium. Peritoneal cells  
138 (neutrophils and macrophages) using elicitation methods after an intraperitoneally injection of  
139 fetal bovine serum [27]. Neutrophils (PNs) were isolated 21 hours after injection of FBS while  
140 macrophages were harvested 3 days after injection of FBS. Ten millilitres of cold RPMI were  
141 injected in the peritoneal and the exudate was collected in sterile assay tube by syringe. The  
142 exudates containing the cells were then centrifuged at 1200 rpm for 10 min at 4°C, and the  
143 cells were washed twice and re-suspended in complete RPMI medium. Cells were counted  
144 using a haemocytometer, and viability was assessed by trypan blue exclusion. Cell number  
145 was therefore adjusted to the needed density.

#### 146 *Preparation of Carbon Particle Suspension*

147 A stable suspension of carbon particles was obtained by suspending the ultra-fine  
148 carbon powder in complete RMPI 1640. Then, the mass concentration of carbon particles in  
149 suspension was quantified by measuring the optical density at 800 nm with a  
150 spectrophotometer. A linear relationship has shown between mass concentration of carbon  
151 particles and optical density (Fig. 1).

152 **Fig. 1.** Correlation between the concentration of suspended carbon particles and optical  
153 density at 800 nm.

#### 154 *In vitro immunomodulation studies*

155 *Cell Stimulation*

156 Neutrophils or macrophages were cultured with the extracts in 96-wells plate for then  
157 incubated at 37°C in a 5% CO<sub>2</sub> humidified atmosphere in RPMI 1640 medium with the  
158 extracts for final concentrations (20 to 640 µg/ml) and LPS (4 µg/ml). Cell cultured added  
159 into well containing LPS only and medium only were taken as positive and negative controls,  
160 respectively. All solutions used were ensured to be lipopolysaccharide-free, and all assays  
161 were performed in triplicate and under sterile conditions. The cells were stimulated as  
162 described for all the various assays.

163 *Phagocytosis Assay*

164 In order to examine whether extracts affect the phagocytic activity of macrophages  
165 and neutrophils, *carbon Particles* were used as test particles in the studies of phagocytosis. A  
166 modification of the method as described by Margot <sup>[28]</sup> was used for the assessment of  
167 phagocytic function. Briefly, 1 ml of carbon particles in complete medium (25µg/ml)  
168 containing the extracts was added to test tubes with and without 1.5 x 10<sup>6</sup> peritoneal cells. The  
169 samples were placed in a shaking water bath at 37°C for 12 h in order to obtain cells  
170 (macrophages and neutrophils) with attached and ingested carbon particles. The tubes were  
171 then centrifuged at 1000 tr/min for 15 min. The supernatants from the tubes with and without  
172 cells were measured in the spectrophotometer and the difference in carbon particle  
173 concentration was taken as a measure of attached and ingested particles.

174 *Assay of Oxidative Metabolism*

175 The oxidative metabolism was measured by using the ability of the produced  
176 superoxide to reduce yellow nitroblue tetrazolium (NBT) to blue formazan. The assay was  
177 done to scrutinize the production of superoxide anion which is proportionally to reduction of



178 the NBT. The assay was performed as previously described [29] in macrophages and  
179 neutrophils ( $1.5 \times 10^5$  cells/mL) from three rats. After 48 h of incubation with or without  
180 extracts at 37°C in a 5% CO<sub>2</sub> humidified incubator, 50 µl of freshly prepared 1.5 mg/ml NBT  
181 dye solution was added. Then, the adherent phagocytes were rinsed vigorously after  
182 incubation for 60 min with RPMI medium and washed four times with methanol. After air  
183 drying, 2 M KOH and DMSO were added, and the absorbance was measured at 570 nm using  
184 a microplate reader.

#### 185 *Nitric Oxide Determination*

186 Nitric oxide (NO) concentration was determined after 48 hours incubation with  
187 samples in 96-well plates, NO levels in each well were identified using the Griess reagent  
188 according to a previous study [29]. After pre-incubation of macrophages or neutrophils ( $1.5$   
189  $\times 10^5$  cells/mL) with LPS (4 µg/mL) for 48 h, the quantity of nitrite in the culture medium was  
190 measured as an indicator of NO production. Amounts of nitrite, a stable metabolite of NO,  
191 were measured using Griess reagent (1% sulfanilamide and 0.1% naphthylethylenediamine  
192 dihydrochloride in 2.5% phosphoric acid) in 100 µl of the supernatant. The supernatant was  
193 mixed with equal volume of Griess reagent and the absorbance at 540 nm was measured in a  
194 microplate reader after incubation for 30 min.

#### 195 *Acid Phosphatase Determination*

196 Macrophages or neutrophils ( $1.5 \times 10^5$  cells/mL) were incubated with LPS (4 µg/mL).  
197 After the desired length of time (48 hours) of incubation, the culture media were removed.  
198 Plates were washed twice with PBS. The adherent cells were then lysed with 100 µl of cold  
199 lysis buffer (0.2% Triton X-100 in 0.05M acetate buffer pH 5.4) and sonication (the cell  
200 plates were placed on ice) for 30 minutes. Cell extracts (100 µL) were mixed with 100 µl of  
201 an assay mixture containing 20 µl glacial acetic acid, 6 mg/mL *P*-NPP, and 0.1 mol/L acetate

202 buffer (pH, 5.4). At 65 minutes, the reaction was stopped by the addition of 100  $\mu$ L 1 N  
203 NaOH. The color was measured at 410 nm in a microplate reader. The activity of the extract  
204 (% stimulation) was calculated using the absorbance of treated and untreated wells.

#### 205 *Expression of Percentage of stimulation*

206 The assay was carried out in triplicates. The activity of extract was expressed as  
207 percentage of stimulation in each of the test well. The % of stimulation was calculated  
208 according to the following formula:

$$209 \quad \% \text{ of stimulation} = \frac{OD \text{ sample} - OD \text{ control}}{OD \text{ control}} \times 100\%.$$

210 The OD control is the optical density of negative control and OD sample, the optical density  
211 of sample.

#### 212 *In vivo immunomodulation studies*

##### 213 *In vivo leucocytes mobilization*

214 Leucocytes mobilization method as described by Ribeiro <sup>[30]</sup> was used with few  
215 modifications to study the effect of the extracts on *in vivo* leucocytes migration induced by  
216 inflammatory stimulus. Thirty adult male mice infected intraperitoneally with *Salmonella*  
217 *typhi* were divided into five groups of 6 each. On day 3 and 7 post infection, three groups  
218 were given 250, 500 and 1000 mg/kg weight of extract, respectively by gavage. One of the  
219 remaining groups has received 7.5 mg/kg body weight of Levamisole and the last group was  
220 left as a control. One hour later, each mouse received intraperitoneal injection of 0.5 mL of  
221 3% agar suspension in normal saline. Four hours later, the mice were sacrificed under  
222 anaesthesia and the peritoneum washed with 5 mL of phosphate buffer saline containing 0.5  
223 mL of 10% EDTA. The peritoneal fluid was recovered and total leucocytes counts (TLC)

224 determined with haemocytometer and the differential cell count was determined by  
225 microscopic counting of Giemsa stained perfusate smear on glass slide.

### 226 *Antibody Titrations*

227 *Salmonella typhi* agglutinins were measured by an agglutination test using an antigen  
228 equivalent to  $10^9$  organisms per ml and doubling dilutions of anti-sera starting as 1/10. The  
229 tests were incubated at 37°C for 12 hours, and then read. A second reading was made after a  
230 further incubation for 15 hours at room temperature. The titer of the serum was taken as the  
231 highest dilution in which definite agglutination was detected.

### 232 *Infection model*

233 Inoculum contained a dose of *S. typhi* ( $10^8$  CFU in 1 ml of saline) was given to mice  
234 orally by gavage. Twenty seven days after inoculation, the animals were euthanized with  
235 diethyl ether and evaluated for blood infestation by *S. typhi*. Heparinized blood samples were  
236 obtained by tail vein puncture, and duplicate 100- $\mu$ l aliquots were plated on SDS. The  
237 carriage rate was defined as the number of animals with  $\geq 1$  CFU divided by the total number  
238 of mice per group.

### 239 *Data Analysis*

240 Experiments were done in triplicate or quadruplicate. Experimental results are  
241 presented as mean  $\pm$  standard deviation. Data analysis was performed by one-way analysis of  
242 variance test followed by Tukey's multiple comparison tests. Analysis was done using the  
243 program Graphpad Prism version 5.0. A P-value  $< 0.05$  was considered statistically.

### 244 *Results*

245 *Carbon Particles uptake*

246 Table 1 shows a comparison of the percentage of carbon particles uptaken by  
 247 macrophages and neutrophils treated with M-Extract and D-Extract carbon particles. In all  
 248 samples, exposure to extracts increased ingested particles per peritoneal macrophages and  
 249 neutrophils, the accumulated attachment, and the ingested fraction. The values for all extract  
 250 concentrations (40, 160 and 640  $\mu\text{g/ml}$ ) were highly different compared to untreated  
 251 macrophages and neutrophils ( $P < 0.05$ ) showing that PNs and PMs have reduced the particles  
 252 put in presence. Respectively for PMs and PNs the reduced carbon particles was 11.84 and  
 253  $14.87 \mu\text{g}/10^6$  cells at concentrations  $640 \mu\text{g/ml}$ .

254 **Table. 1. Effect of methanol and diethyl ether extracts of *M. charantia* on the uptake of**  
 255 **carbon particles by macrophages and neutrophils.**

| Samples                                         | Methanol extract           |                          | Diethyl ether extract      |                          |
|-------------------------------------------------|----------------------------|--------------------------|----------------------------|--------------------------|
|                                                 | % reduction of OD          | $\mu\text{g}/10^6$ cells | % reduction of OD          | $\mu\text{g}/10^6$ cells |
| Attached and Ingested particles per Macrophages |                            |                          |                            |                          |
| Controls                                        |                            |                          |                            |                          |
| (-) control                                     | $31.87 \pm 1.54$           | 5.31                     | $31.87 \pm 1.54$           | 5.31                     |
| (+) control                                     | $52.99 \pm 1.154^{***}$    | 8.83                     | $52.99 \pm 1.154^{***}$    | 8.83                     |
| Extracts ( $\mu\text{g/ml}$ )                   |                            |                          |                            |                          |
| 40                                              | $^{a}53.98 \pm 1.32^{***}$ | 8.99                     | $^{a}42.01 \pm 1.94^{***}$ | 7.00                     |
| 160                                             | $^{b}70.81 \pm 1.12^{***}$ | 11.80                    | $^{b}57.25 \pm 1.66^{***}$ | 9.54                     |

|                                                 |                             |       |                             |       |
|-------------------------------------------------|-----------------------------|-------|-----------------------------|-------|
| 640                                             | <sup>c</sup> 85.53±0.83***  | 14.25 | <sup>c</sup> 71.07±0.41***  | 11.54 |
| Attached and Ingested particles per Neutrophils |                             |       |                             |       |
| Controls                                        |                             |       |                             |       |
| (-) control                                     | 43.14±3.70                  | 7.19  | 43.14±3.70                  | 7.19  |
| (+) control                                     | 82.67±1.79***               | 13.77 | 82.67±1.79***               | 13.77 |
| Extracts (µg/ml)                                |                             |       |                             |       |
| 40                                              | <sup>a</sup> 85.63±0.14***  | 14.27 | <sup>a</sup> 83.08±0.97***  | 13.84 |
| 160                                             | <sup>ab</sup> 87.51±0.92*** | 14.58 | <sup>ab</sup> 86.12±0.09*** | 14.35 |
| 640                                             | <sup>b</sup> 90.46±0.98***  | 15.07 | <sup>b</sup> 89.23±0.56***  | 14.87 |

256 **Notes.** Three samples in three mice were studied. The amounts of carbon taken up by the cells  
 257 were estimated by measurements of optical density (OD) of the carbon particle suspension  
 258 (25 µg/ml) without the (1.5x10<sup>6</sup> cells/ml) were added and after the cells were removed by  
 259 centrifugation. The asterisks indicate the significant difference relative to (-) control  
 260 determined by Tukey's test (p ≤ 0.05). In the same column, the letters indicate the significant  
 261 difference determined by Tukey's test (p ≤ 0.05).

## 262 *Superoxide anion production*

263 *M. charantia* through D-Extract and M-Extract increased NBT dye reduction relative  
 264 to untreated cells of LPS-induced mouse neutrophils in a dose dependent fashion at  
 265 concentration ≥ 320 µg/ml (Fig. 2). In detail, in presence of D-Extract, the % of stimulation of  
 266 NBT dye reduction in neutrophils at concentration of 640 and 320 µg/ml for 48 h was 68.48 ±  
 267 3.74%, 58.85 ± 3.23% and 46.52 ± 3.18% of LPS-control, respectively. With M-Extract at

268 concentration of 640 and 320  $\mu\text{g/ml}$ , the NBT dye reduction was  $88.28 \pm 7.43\%$ ,  $74.47 \pm$   
269  $6.72\%$  and  $50.00 \pm 9.08\%$  of LPS-control, respectively. A dose dependent increase of NBT  
270 dye reduction was also observed in macrophages. A significant increase was observed with D-  
271 Extract at 640  $\mu\text{g/ml}$  where the % of stimulation was  $45.83 \pm 13.88\%$  and  $7.87 \pm 2.89\%$  for  
272 LPS-control. While, the incubation with M-Extract has resulted in augmentation of NBT  
273 reduction at 640, 320 and 150  $\mu\text{g/ml}$  where the effect were  $31.11 \pm 2.77\%$ ,  $21.01 \pm 2.12\%$ ,  
274  $10.09 \pm 0.80\%$  and  $6.01 \pm 0.80\%$  for LPS-control, respectively.

275 **Fig. 2.** Stimulatory properties of the diethyl ether extracts (D-extract) and methanol extract  
276 (M-extract) on superoxide anion production by lipopolysaccharide (LPS)-induced peritoneal  
277 mouse macrophages (M) and neutrophils (N). The histogram expressed the mean  $\pm$  SD (n =  
278 4). The asterisks indicate the significant difference relative to LPS-control ( $4\mu\text{g/ml}$ )  
279 determined by Tukey's test ( $p \leq 0.05$ ). The letters indicate the significant difference determined  
280 by Tukey's test ( $p \leq 0.05$ ). SD and ND indicate respectively the significant difference and the  
281 absence of difference in the action of the two extracts determined by Tukey's test ( $p \leq 0.05$ ).

## 282 *Nitric oxide concentration*

283 The results of this study as presented in figure 3 demonstrated that *M. charantia*  
284 through its D-extract and M-extract at various concentrations caused a significant increase of  
285 NO production by both neutrophils and macrophages when compared with the LPS control  
286 (Fig.4). For the M-extract which has stimulated the NO production in macrophages only, the  
287 detail of the production at concentrations of 640, 320, 150, 80, 40 and 20  $\mu\text{g/mL}$  for 48 h were  
288  $232.98 \pm 28.34\%$ ,  $128.76 \pm 5.52\%$ ,  $94.27 \pm 7.38\%$ ,  $83.50 \pm 6.35\%$ ,  $47.97 \pm 12.11\%$ ,  $34.83 \pm$   
289  $18.56\%$  and respectively, compared to  $89.32 \pm 1.84\%$  of the control group treated with media  
290 only. On neutrophils, both D-extract and M-extract has promoted the production of NO ( $p <$   
291  $0.05$ ). In detail, the production of NO in LPS-induced neutrophils incubated with D-extract at

292 concentrations of 640, 320, 150, 80, 40 and 20  $\mu\text{g}/\text{mL}$  for 48 h were  $108.80 \pm 1.40\%$ ,  $84.70 \pm$   
293  $12.21\%$ ,  $60.52 \pm 20.21\%$ ,  $23.63 \pm 3.11\%$ ,  $24.14 \pm 8.70\%$ ,  $4.67 \pm 1.80\%$  and  $37.58 \pm 3.89\%$  of  
294 the group treated with LPS only, respectively. The production of NO in LPS-induced  
295 neutrophils incubated with M-extract at the same concentrations were  $297.91 \pm 62.21\%$ ,  
296  $171.45 \pm 39.42\%$ ,  $129.50 \pm 27.07\%$ ,  $79.37 \pm 12.47\%$ ,  $47.54 \pm 14.51\%$ ,  $36.03 \pm 19.06\%$  and  
297  $37.58 \pm 3.89\%$  of the group treated with LPS only, respectively.

298 **Figure 3:** Stimulatory properties of the diethyl ether extracts (D-extract) and methanol extract  
299 (M-extract) on nitric oxide production by lipopolysaccharide (LPS)-induced peritoneal mouse  
300 macrophages (M) and neutrophils (N). The histogram expressed the mean  $\pm$  SD ( $n = 4$ ). The  
301 asterisks indicate the significant difference relative to LPS-control ( $4\mu\text{g}/\text{ml}$ ) determined by  
302 Tukey's test ( $p \leq 0.05$ ). The letters indicate the significant difference determined by Tukey's  
303 test ( $p \leq 0.05$ ). SD indicates the significant difference in the action of the two extracts  
304 determined by Tukey's test ( $p \leq 0.05$ ).

### 305 *Acid phosphatase activity*

306 Acid phosphatase activity was measured in LPS-induced neutrophils and macrophages  
307 after two days of incubation with the extracts. Our results showed that AcP activity, by with  
308 the presence of D-Extract and M-Extract was significantly increased in a dose-dependent  
309 manner (Fig. 4). The 640  $\mu\text{g}/\text{mL}$  extracts only showed significantly higher augmentation of  
310 AcP activity in neutrophils ( $p < 0.05$ ). At 640  $\mu\text{g} / \text{ml}$  of D-Extract and M-Extract, the % of  
311 stimulation was  $63.28 \pm 6.53\%$ ,  $59.90 \pm 6.03\%$  and  $36.23 \pm 8.19\%$  for LPS-control,  
312 respectively. Both the diethyl ether and methanol extracts showed significant augmentation  
313 dose dependent of AcP activity in macrophages ( $p < 0.05$ ). The percentage of stimulation in  
314 LPS-induced macrophages incubated with D-extract at concentrations of 640, 320 and 150  
315  $\mu\text{g}/\text{mL}$  were  $328.99 \pm 3.58\%$ ,  $216.89 \pm 2.15\%$  and  $194.64 \pm 5.84\%$  respectively. In cells

316 incubated with M-Extract at concentrations of 640, 320 and 150  $\mu\text{g}/\text{mL}$  the percentage of  
317 stimulation were  $794.33 \pm 79.26\%$ ,  $568.19 \pm 60.58\%$ ,  $309.49 \pm 32.46\%$  and  $134.15 \pm 17.54\%$   
318 of the LPS-treated group value, respectively.

319 **Figure 4:** Stimulatory properties of the diethyl ether extracts (D-extract) and methanol  
320 extract (M-extract) on acid phosphatase activity in lipopolysaccharide (LPS)-induced  
321 peritoneal mouse macrophages (M) and neutrophils (N). The histogram expressed the mean  $\pm$   
322 SD (n = 4). The asterisks indicate the significant difference relative to LPS-control ( $4\mu\text{g}/\text{ml}$ )  
323 determined by Tukey's test ( $p \leq 0.05$ ). The letters indicate the significant difference  
324 determined by Tukey's test ( $p \leq 0.05$ ). SD and ND indicate respectively the significant  
325 difference and the absence of difference in the action of the two extracts determined by  
326 Tukey's test ( $p \leq 0.05$ ).

#### 327 *Leucocytes mobilization*

328 The effect of the extracts on in vivo leucocytes mobilization led to augmentation in  
329 total leucocytes count. With M-extract, the concentrations 500 mg/kg and 1000 mg/kg  
330 significantly increased the total leucocytes count from control group, with the effect higher  
331 than levamisole group. In differential leucocytes mobilization, all the tested doses  
332 significantly increased the lymphocyte count, while monocyte count has been increased in  
333 1000 mg/kg group. In contrast, the basophil and eosinophil of the extract treated group  
334 showed decrease in number when compared with the control group (Table 2).  
335 Concentrations 500 mg/kg and 1000 mg/kg of D-extract also significantly increased the total  
336 leucocytes count in concentration dependent manner compared to control group. In  
337 differential leucocytes mobilization, all the tested doses significantly increased the  
338 lymphocyte count. while, the basophil and eosinophil showed decrease in number when  
339 compared with the control group (Table 3).



340 Table 2. Effect of *M. charantia* leaf methanol extract on total and differential leucocytes mobilization (cells/ml) in mice

|              | Extract                      |                                |                               | Levanisole                | Control                   |
|--------------|------------------------------|--------------------------------|-------------------------------|---------------------------|---------------------------|
|              | 250 mg/kg                    | 500 mg/kg                      | 1000 mg/kg                    | 7.5 mg/kg                 | -                         |
| <b>TLC</b>   | 1416,6±166,55a               | 1675,6±144,60**b               | 1981±461,18***b               | 1184,4±149,24             | 962,28±144,41             |
| <b>NEUT</b>  | 318,35±147,30<br>(22,09)     | 391,04±167,52<br>(22,95)       | 462,40±132,83<br>(23,44)      | 283,69±75,77<br>(23,82)   | 445,53±197,16<br>(45,68)  |
| <b>LYMPH</b> | 1069,60±146,38**a<br>(75,88) | 1266,06±111,73***ab<br>(75,97) | 1467,92±364,80***b<br>(73,85) | 892,12±108,61*<br>(75,47) | 477,33±153,21<br>(50,186) |
| <b>BASO</b>  | 4,38±4,51<br>(0,29)          | 0,03±0,07**<br>(0,00)          | 0,00±0,00**<br>(0,00)         | 0,46±0,60**<br>(0,04)     | 10,11±6,24<br>(1,07)      |
| <b>MONO</b>  | 15,10±5,12a<br>(1,07)        | 1,22±1,14*b<br>(0,07)          | 30,95±7,59***c<br>(1,61)      | 1,64±0,94*<br>(0,13)      | 14,06±7,90<br>(1,50)      |
| <b>EOSIN</b> | 0,03±0,06<br>(0,03)          | 4,92±2,44<br>(0,29)            | 3,93±2,34<br>(0,21)           | 5,38±7,09<br>(0,42)       | 9,27±6,00<br>(0,93)       |

341 Mean ± SD with different superscript letters are significantly different (p < 0.05).

342 Table 3. Effect of *M. charantia* leaf diethyl ether extract on total and differential leucocytes mobilization (cells/ml) in mice

|                   | Extract                                 |                                           |                                           | Levamisole                            | Control                  |
|-------------------|-----------------------------------------|-------------------------------------------|-------------------------------------------|---------------------------------------|--------------------------|
|                   | 250 (mg/kg)                             | 500 (mg/kg)                               | 1000 (mg/kg)                              |                                       |                          |
| <b>TLC</b>        | 1356±191.94 <sup>a</sup>                | 1515.8±311.80 <sup>*a</sup>               | 1804.15±322.71 <sup>***a</sup>            | 1151.32±172.10                        | 962.28±134.41            |
| <b>Neutrophil</b> | 311.90±165.23 <sup>a</sup><br>(22.09)   | 400.09±119.91 <sup>a</sup><br>(26.37)     | 472.64±116.89 <sup>a</sup><br>(26.02)     | 303.11±62.80<br>(26.22)               | 411.43±160.73<br>(42.92) |
| <b>Lymphocyte</b> | 1016.38±95.17 <sup>**a</sup><br>(75.88) | 1102.57±243.62 <sup>***a</sup><br>(72.78) | 1289.80±215.62 <sup>***a</sup><br>(71.65) | 842.42±121.06 <sup>*</sup><br>(73.28) | 504.96±170.48<br>(52.33) |
| <b>Basophil</b>   | 4.27±4.49 <sup>***a</sup><br>(0.29)     | 0.03±0.07 <sup>***a</sup><br>(0.00)       | 0.00 <sup>***a</sup><br>(0.00)            | 0.45±0.52 <sup>***</sup><br>(0.04)    | 15.51±4.04<br>(1.60)     |
| <b>Monocyte</b>   | 16.39±9.32 <sup>a</sup><br>(1.2)        | 0.63±0.79 <sup>***b</sup><br>(0.04)       | 19.60±3.82 <sup>a</sup><br>(1.08)         | 1.75±0.48 <sup>***</sup><br>(0.15)    | 20.23±4.72<br>(2.10)     |
| <b>Eosinophil</b> | 0.40±0.91 <sup>***a</sup><br>(0.03)     | 4.81±1.68 <sup>b</sup><br>(0.32)          | 5.29±0.95 <sup>b</sup><br>(0.30)          | 0.20±0.46 <sup>***</sup><br>(0.02)    | 7.05±2.53<br>(0.71)      |

343 Mean ± SD with different superscript letters are significantly different (p < 0.05).

344 *Anti- Salmonella typhi antibody titers*

345 Antibodies against *Salmonella typhi* were determined by HA technique. The results  
346 showed that HA titers increased after treatment at day 14 and day 28 in animal. In the M-  
347 extract treated group, the primary antibody titers ranged from 160 to 640 (mean of 228 and 17  
348 in the control group) at 500 mg/kg, whereas that of animal receiving 1000 mg/kg was from  
349 320 to 1280 (mean of 1280). For this extract also an increase of antibodies at day 28 with a  
350 mean of 1664 and 4096 at the doses of 500 and 1000 mg/kg, whereas that of the control group  
351 was 44. An increase in antibody titers was also seen in levamisole treated group as well as at  
352 day 14 with a mean of 960 and 2304 at day 28 (Fig. 5).

353 **Fig. 5:** Effect of methanol extract on the antibody titre against *Salmonella typhi* in mice. The  
354 probability is the result of turkey test indicating the difference of the doses against control.

355 Besides, the results of this study in animals treated with D-extract, antibody titer  
356 against *S. typhi* was significantly increased in group receiving 1000 mg/kg with a mean of 168  
357 at day 14. While at day 28, increase of antibody titer was seen in groups receiving the extract  
358 at 500 and 1000 mg/kg with means of 416 and 1152 respectively. HA titer means at day 14  
359 and 28 were 18 and 448 in the levamisole treated group, whereas the means were 8 and 11 in  
360 the control group (Fig.6).

361 **Fig. 6:** Effect of diethyl ether extract on the antibody titre against *Salmonella typhi* in mice.  
362 The probability is the result of turkey test indicating the difference of the doses against  
363 control.

364 *Effect on the blood infestation rate*

365 At the time of blood collection after three experiment carry out independently, the  
366 percentage of mice having blood infested with  $\geq 1$  CFU of *S. typhi* in 500 and 1000 mg/kg

367 treated groups was significantly lower than that of control groups. The proportion of infected  
368 animal was found to be 83.33% and 44.44% respectively for 500 and 1000 mg/g/kg against  
369 94.44% for the control group. Levamisole also significantly decreased the proportion of mice  
370 with infested blood (38.88%) compared to control group (Fig. 7).

371 **Fig. 7:** Blood infestation of mice with *Salmonella typhi* following the extract doses. The *P*  
372 values derived from the statistical comparison of carriage rate from the groups of untreated or  
373 treated extract-treated mice are shown below the graph. A  $P < 0.05$  was considered significant.

### 374 **Discussion**

375 Many studies have addressed the immunomodulatory activities of *M. charantia* but,  
376 very little is known about phagocytic mechanisms and factors that influence blood infestation  
377 by bacterial strain. Passage of Salmonella strain in the blood is a multifactorial process that  
378 requires a variety of adaptive mechanisms, including adherence to host tissues, and host  
379 defenses. Identifying the immunotherapeutic factors of *M. charantia* that influence blood  
380 infestation by this bacterium is a best way for the use of tis plant. We have studied the  
381 phagocytic activity of the M-extract and D-extract of leaf of *M. charantia* in vitro in  
382 macrophages and neutrophils. Furthermore, we treated with extracts oral infected mice to  
383 conclude about the role *M. charantia* leaf in treatment of salmonellosis as pretending the  
384 traditional therapists in North West region of Cameroon.

385 It has been found that exposure of neutrophils and macrophages to M-Extract and D-  
386 Extract stimulates both their capacity to ingest foreign particles and their intracellular killing  
387 activities. This activity demonstrates an immunostimulation of phagocytosis [5,31]. After  
388 exposure to extracts neutrophils and macrophages were found to be more functionally, as  
389 shown by the release of oxygen radicals. The results follow the earlier studies exhibiting *in*

390 *vivo* and *in vitro* stimulatory effect of phagocytic activity by fruits of this plant [8-10].  
391 Production of the reactive oxygen species (ROS) is known to be increased during infection  
392 through activation of NADPH oxidase, therefore *M. charantia* leaf may be stimulated  
393 synthesis or activation of NADPH oxidase.

394 Furthermore, it has been demonstrated that the extracts stimulate the production of  
395 nitric oxide. The role of this nitrogen reactive specie is well known during immune reactions  
396 [32], and its production by neutrophils and macrophages is a result of iNOS synthesis. The  
397 effect of *M. charantia* leaf extracts in salmonellosis may be also attributed to that reactive  
398 specie production.

399 Under circumstances as bacteria activation, neutrophils or macrophages synthesis acid  
400 phosphatase, what it has been seen in neutrophils and macrophages exposed to extracts. Thus,  
401 *M. charantia* leaf might contribute in elimination of bacteria by stimulating lysosomal  
402 enzymes synthesis.

403 The result of this present study indicated that the extract increased the total leucocytes  
404 count of the perfusate when compared with the control group. Leucocytes migration is  
405 important for the transport of immunological information between different compartments of  
406 the immune system [33], suggesting that are stimulating the response to *S. typhi*. In addition, it  
407 has been found that all the tested doses improved the lymphocyte count. These cells are more  
408 important in the production of immunomodulatory cytokines and production of antibodies.  
409 Particularly, Th2 lymphocytes are direct leukocyte producing of IL-4, suggesting a prominent  
410 role for these cells of the adaptive immune system in the biology of B cells notably  
411 production of immunoglobulins what can be attributed to *M. charantia* leaf extracts.

412 In the current study, the primary antibody titer was found to be high in extract-treated  
413 group for 1000 mg/kg. This effect of enhancement of the antibody production by the extracts  
414 may be associated with effect on lymphoid cells as demonstrated by high mobilization of

415 these cells. When the mice were sensitized with the bacteria, bacteria antigen was then taken  
416 up by macrophages and was processed. When a T lymphocyte sees the processed antigens on  
417 the B cell, the T cell then stimulates the B cells to undergo repeated cell divisions,  
418 enlargement and differentiation to form a clone of antibody secreted by plasma cells. Hence,  
419 the antibody then binds to the antigen, making them easier to ingest by the white blood cells.  
420 In the present study it has been demonstrated the secondary antibody has been increased 500  
421 mg/kg and 1000 mg/kg treated-groups. This indicates enhanced responsiveness of  
422 macrophages, T and B lymphocytes involved in antibody synthesis by the extracts.

423 When *S. typhi* was given to mice, it has been found that the strain passes into blood  
424 and multiply. Using the extracts to avoid this blood infestation in mice, it was found the  
425 proportion of animal having bacterium in their blood decreases for certain concentration as it  
426 is for levamisole, a well-known immunostimulant drug. This experiment might be used as  
427 proof of the possible immunotherapeutic impact of *M. charantia* leaf extracts against *S. typhi*  
428 by simulating the phagocytic mechanisms or antibodies directed against such bacteria entering  
429 into the bloodstream, both of which have proven to be successful in eliminating or preventing  
430 blood from infection by microbes.

### 431 **Conclusion**

432 The result of the current study suggests that immunomodulation may be a key factor in  
433 therapeutic activity of extract of *Momordica charantia* leaf in treatment of salmonellosis.

### 434 **Abbreviations**

435 AcP = acid phosphatase

436 DMSO = dimethyl sulfoxide

437 FBS = fetal bovine serum,

- 438 LPS = lipopolysaccharide  
439 MTT = 3- (4,5-dimethylthiazol-2-yl) -2.5-diphenyl tetrazolium bromide  
440 NBT = nitroblue tetrazolium  
441 NR = neutral red  
442 OD = optical density  
443 PBS = phosphate buffered saline  
444 PM = peritoneal macrophages  
445 P-NPP = para-nitrophenylphosphate  
446 PN = Peritoneal neutrophils  
447 RPMI = Roswell Park Memorial Institute  
448 NO = Nitric oxide

449 ***Declarations***

450 *Ethics approval*

451 All animal handling protocols were performed following the guidelines in the  
452 Department of Biological Sciences, Faculty of Science, University of Bamenda, Cameroon  
453 which followed the « Principles of Laboratory Animal Care » from NIH publication Nos 85-  
454 23 approved by the ethic committee of the Cameroon Ministry of Scientific Research and  
455 Technology which has adopted the guidelines established by the European Union on Animal  
456 Care and Experimentation (CEE Council 86/609).

457 *Consent for publication*

458 All authors have read and approved the publication of the manuscript.

459 *Availability of data and material*

460 Data and material are available on needs.

461 *Competing Interests*

462 The authors declare there are no competing interests.

463 *Funding*

464 The authors declare there is not grant for this research.

465 *Author Contributions*

466 **OM**: He performed the experiments, analyzed the data, wrote the paper, prepared  
467 figures and/or tables, and reviewed drafts of the paper, principal investigator. **HF**: She  
468 contributed analysis and experiments. **TC** and **KA**: They reviewed drafts of the paper.

469 *Acknowledgment*

470 This research was done at the Institute of Agricultural Research for Development  
471 (IRAD) Bambui, Cameroon. The authors are grateful to the Director of IRAD and its  
472 collaborators. We are thankful to Director and its entire staff for his invaluable help in the  
473 conduction of this research work. We are thankful to Dr. Tacham W., Biological Sciences,  
474 Faculty of Science, University of Bamenda, for his invaluable help in the identification and  
475 collection of plant samples.

476 *References*

- 477 1. Amirghofran Z. Herbal medicines for immunosuppression. *Iran J Allergy Asthma*  
478 *Immunol.*, 2012, 11:111–119.
- 479 2. Alamgir M. and Uddin SJ. Recent advances on the ethnomedicinal plants as  
480 immunomodulatory agents. In: Chattopadhyay D, editor. *Ethnomedicine: a source of*  
481 *complementary therapeutics*. Fort P.O. Kerala, India: Research Signpost; 2010, 227–244.
- 482 3. Kumar V. and Sharma A. Neutrophils: Cinderella of innate immune system. *Int*  
483 *Immunopharmacol.*, 2010, 10:1325–1334.



- 484 4. Eze JI and Ndukwe S. Effect of methanol extract of *Mucuna pruriens* seed on the immune  
485 response of mice. *Comp Clin Pathol.*, 2012, 21:1343-1347.
- 486 5. Jantan I., Ahmad W, Bukhari S.N. Plant-derived immunomodulators: an insight on their  
487 preclinical evaluation and clinical trials. *Front Plant Sci.*, 2015; 25; 6:655. 1 - 18.
- 488 6. Mahima AR, Rajib D, Latheef SK, Samad HA, Tiwari R, Vema AK, Dhama K. 2012.  
489 Immunomodulatory and therapeutic potentials of herbal, traditional/indigenous and  
490 ethnoveterinary medicines. *Pak J Biol Sci.* 15:754–774.
- 491 7. Grover JK and Yadav SP. Pharmacological actions and potential uses of *Momordica*  
492 *charantia* : a review. *Journal of Ethnopharmacology*, 2004, 93 123–132
- 493 8. Shuo J., Mingyue S., Fan Z. and Jianhua X. Recent Advances in *Momordica charantia*:  
494 Functional Components and Biological Activities. *Int. J. Mol.Sci.*, 2017, 18, 2555; 9-25.
- 495 9. Juvekar AR.; Hule AK.; Sakat SS.; Chaughule VA. In vitro and in vivo evaluation of  
496 immunomodulatory activity of methanol extract of *Momordica charantia* fruits. *Drug*  
497 *Invent. Today*, 2009, 1, 89–94.
- 498 10. Panda BC.; Mondal S.; Devi KSP.; Maiti TK; Khatua S.; Acharya K.; Islam SS. Pectic  
499 polysaccharide from the green fruits of *Momordica charantia* (Karela): Structural  
500 characterization and study of immunoenhancing and antioxidant properties. *Carbohydr.*  
501 *Res.*, 2015, 401, 24–31.
- 502 11. Wang X.; Jin H.; Xu Z.; Gao L. Effects of *momordica charantia* L. saponins on immune  
503 system of senile mice. *Acta Nutr. Sin.*, 2001, 263–266.
- 504 12. Deng YY; Yi Y; Zhang LF.; Zhang RF.; Zhang Y.; Wei ZC.; Zhang MW.  
505 Immunomodulatory activity and partial characterization of polysaccharides from  
506 *Momordica charantia*. *Molecules*, 2014, 19, 13432–13447.
- 507 13. Liu JQ; Chen JC.; Wang CF; Qiu MH. New cucurbitane triterpenoids and steroidal  
508 glycoside from *Momordica charantia*. *Molecules* 2009, 14, 4804–4813.

- 509 14. Najafi P.; Torki M. Performance, blood metabolites and immunocompetence of broiler  
510 chicks fed diets included essential oils of medicinal herbs. *J. Anim. Vet. Adv.* 2010, 9,  
511 1164–1168.
- 512 15. Ayeni MJ; Oyeyemi SD; Kayode J; Peter GP. Phytochemical, proximate and mineral  
513 analyses of the leaves of *Gossypium hirsutum* L. and *Momordica charantia* L. *J. Nat. Sci.*  
514 *Res.* 2015, 5, 99–107.
- 515 16. Chen J.; Tian R.; Qiu M.; Lu L.; Zheng Y.; Zhang Z. Trinorcucurbitane and cucurbitane  
516 triterpenoids from the roots of *Momordica charantia*. *Phytochemistry*. 2008, 69, 1043–  
517 1048.
- 518 17. Zhao GT; Liu JQ; Deng YY; Li HZ; Chen JC; Zhang ZR.; Qiu MH. Cucurbitane-type  
519 triterpenoids from the stems and leaves of *Momordica charantia*. *Fitoterapia*, 2014, 95,  
520 75–82.
- 521 18. Chang CI; Chen CR; Liao YW; Cheng HL; Chen YC; Chou CH. Cucurbitane-type  
522 triterpenoids from the stems of *Momordica charantia*. *J. Nat. Prod.* 2008, 71, 1327–1330.
- 523 19. Begum S.; Ahmed M.; Siddiqui BS; Khan A.; Saify ZS.; Arif M. Triterpenes, a sterol and  
524 a monocyclic alcohol from *Momordica charantia*. *Phytochemistry*, 1997, 44, 1313–1320.
- 525 20. Akihisa T.; Higo N.; Tokuda H.; Ukiya M.; Akazawa H.; Tochigi Y.; Nishino H.  
526 Cucurbitane-type triterpenoids from the fruits of *Momordica charantia* and their cancer  
527 chemopreventive effects. *J. Nat. Prod.* 2007, 70, 1233–1239.
- 528 21. Ma L.; Yu AH; Sun LL; Gao W.; Zhang MM; Su YL; Liu H; Ji T. Two new bidesmoside  
529 triterpenoid saponins from the seeds of *Momordica charantia* L. *Molecules*, 2014, 19,  
530 2238–2246.
- 531 22. Murakami T.; Emoto A.; Matsuda H.; Yoshikawa M. Medicinal foodstuffs. XXI.  
532 Structures of new cucurbitane-type triterpene glycosides, goyaglycosides-a,-b,-c,-d,-e,-f,-g,

- 533 and-h, and new oleanane-type triterpene saponins, goyasaponins I, II, and III, from the  
534 fresh fruit of Japanese *Momordica charantia* L. *Chem. Pharm. Bull.*, 2001, 49, 54-63.
- 535 23. Ahmad Z; Zamhuri, KF; Yaacob A; Siong CH; Selvarajah M; Ismail A.; Hakim MN.  
536 In vitro anti-diabetic activities and chemical analysis of polypeptide-k and oil isolated from  
537 seeds of *Momordica charantia* (bitter gourd). *Molecules*, 2012, 17, 9631-9640.
- 538 24. Wen LJ.; Liu WF. Study on extracting and antioxidant activity of flavonoids from  
539 *Momordica charantia* L. *Food Sci.* 2007, 9, 042.
- 540 25. Okabe H.; Miyahara Y.; Yamauchi T; Miyahara K.; Kawasaki T. Studies on the  
541 constituents of *Momordica charantia* LI Isolation and characterization of  
542 momordicosides A and B, glycosides of a pentahydroxy-cucurbitane triterpene. *Chem.*  
543 *Pharm. Bull.* 1980, 28, 2753–2762.
- 544 26. NIH. 1996. Guide for the care and use of laboratory animals. Washington, DC: National  
545 Academy Press.
- 546 27. Aurasorn S., Pattana S. Anti-inflammatory activity of a *Vernonia cinerea* methanolic  
547 extract in vitro. *ScienceAsia*, 2015, 41: 392–399.
- 548 28. Margot L., Urban J-LL., Per G., and Per C. Human Alveolar Macrophage Phagocytic  
549 Function is Impaired by Aggregates of Ultrafine Carbon Particles. *Environmental Research*  
550 *Section A*, 2001, 86:244 – 253.
- 551 29. Oumar M., Tume C., Ateufack G., Ngo TG and Kamanyi A. Immunological In Vivo and  
552 In Vitro Investigations of Aqueous Extract of Stem Bark of *Pterocarpus erinaceus* Poir  
553 (Fabaceae). *Am J Med Sci.*, 2018; 356 (1): 56 – 63.
- 554 30. Ribeiro RA, Flores CA, Cunha F, Ferreira S. 1991. IL-8 causes in vivo neutrophil  
555 migration by a cell-dependent mechanism. *Immunology.* 73:472–477.

- 556 31. Eun-Jin Y., Eun-Young Y., Gwanpil S., Gi-Ok K., Chang-Gu H. Inhibition of nitric oxide  
557 production in lipopolysaccharide-activated RAW 264.7 macrophages by Jeju plant  
558 extracts. *Interdisc Toxicol.* 2009; Vol. 2(4): 245–249.
- 559 32. Adams L., Franco MC and AG. Estevez. Reactive nitrogen species in cellular signaling.  
560 *Exp. Biol. Med.* (Maywood), 2015; 240:711–717.
- 561 33. Förster R, Sozzani S. 2013. Emerging aspects of leukocyte migration. *Eur J Immunol.*,  
562 43:1404–1406.

**Fig.1.**

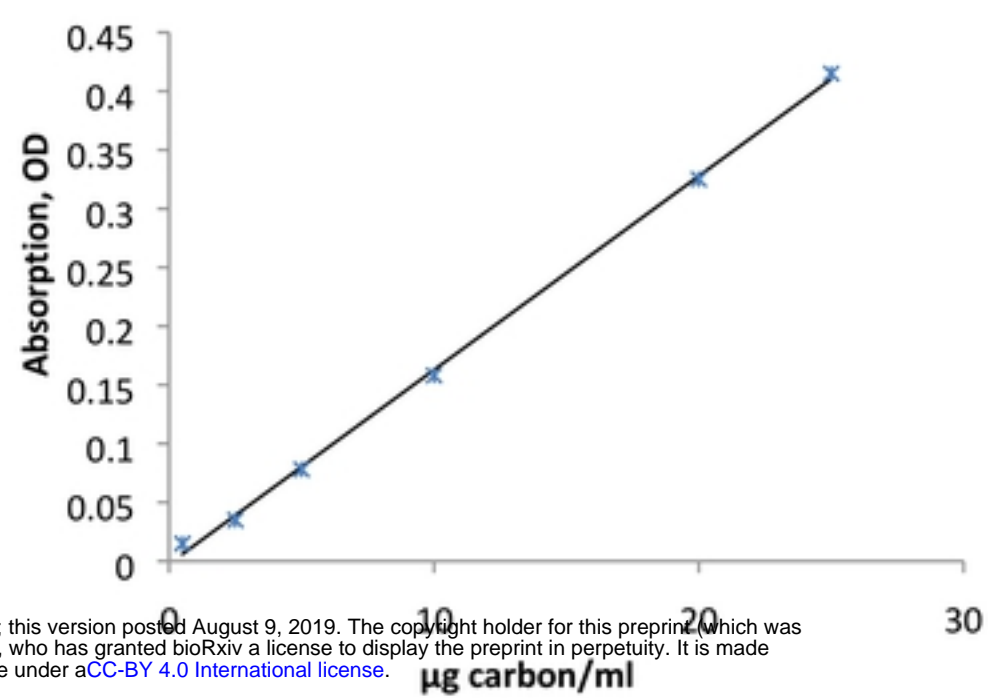

bioRxiv preprint doi: <https://doi.org/10.1101/731034>; this version posted August 9, 2019. The copyright holder for this preprint (which was not certified by peer review) is the author/funder, who has granted bioRxiv a license to display the preprint in perpetuity. It is made available under aCC-BY 4.0 International license.

**Fig.2.**

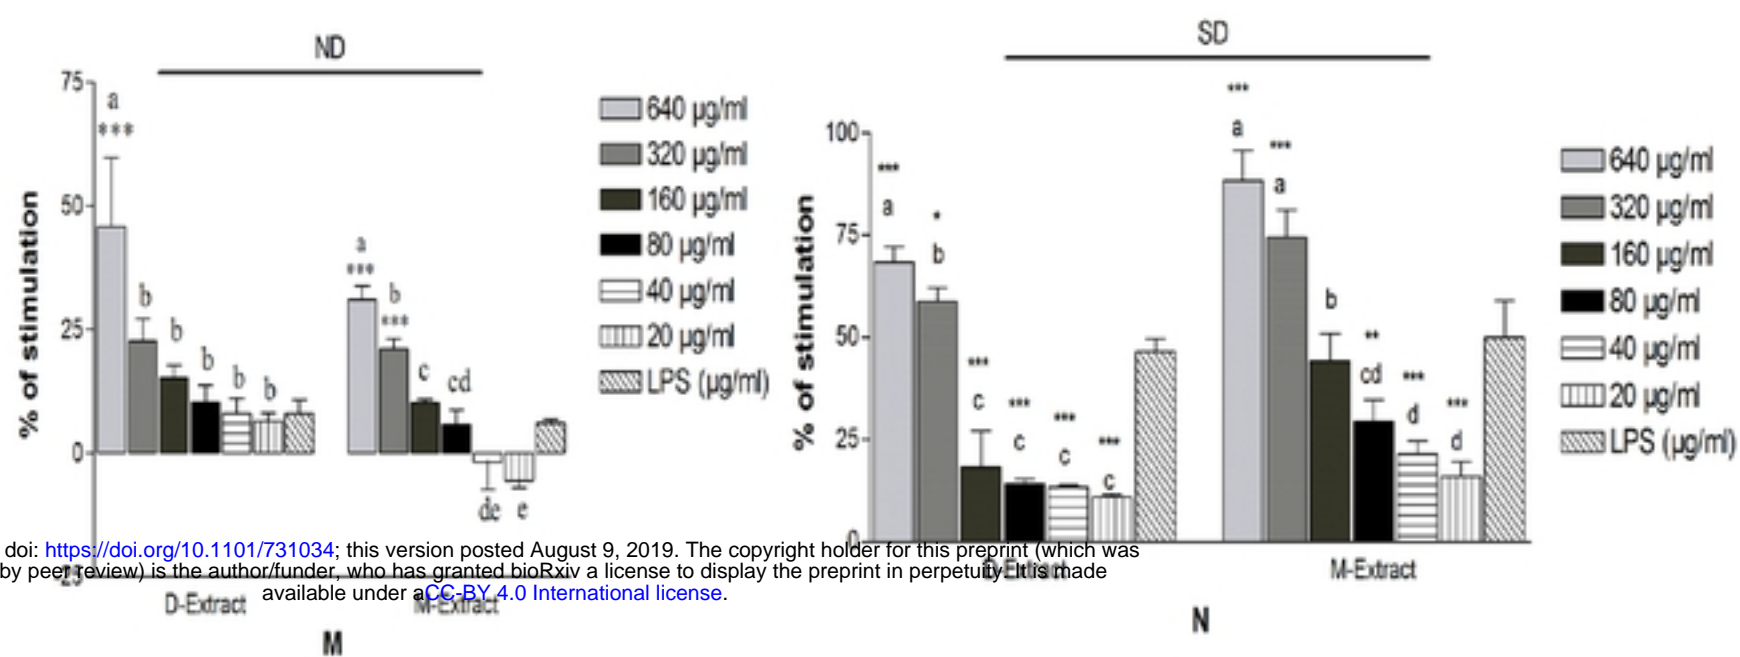

bioRxiv preprint doi: <https://doi.org/10.1101/731034>; this version posted August 9, 2019. The copyright holder for this preprint (which was not certified by peer review) is the author/funder, who has granted bioRxiv a license to display the preprint in perpetuity. It is made available under aCC-BY 4.0 International license.

**Fig.3.**

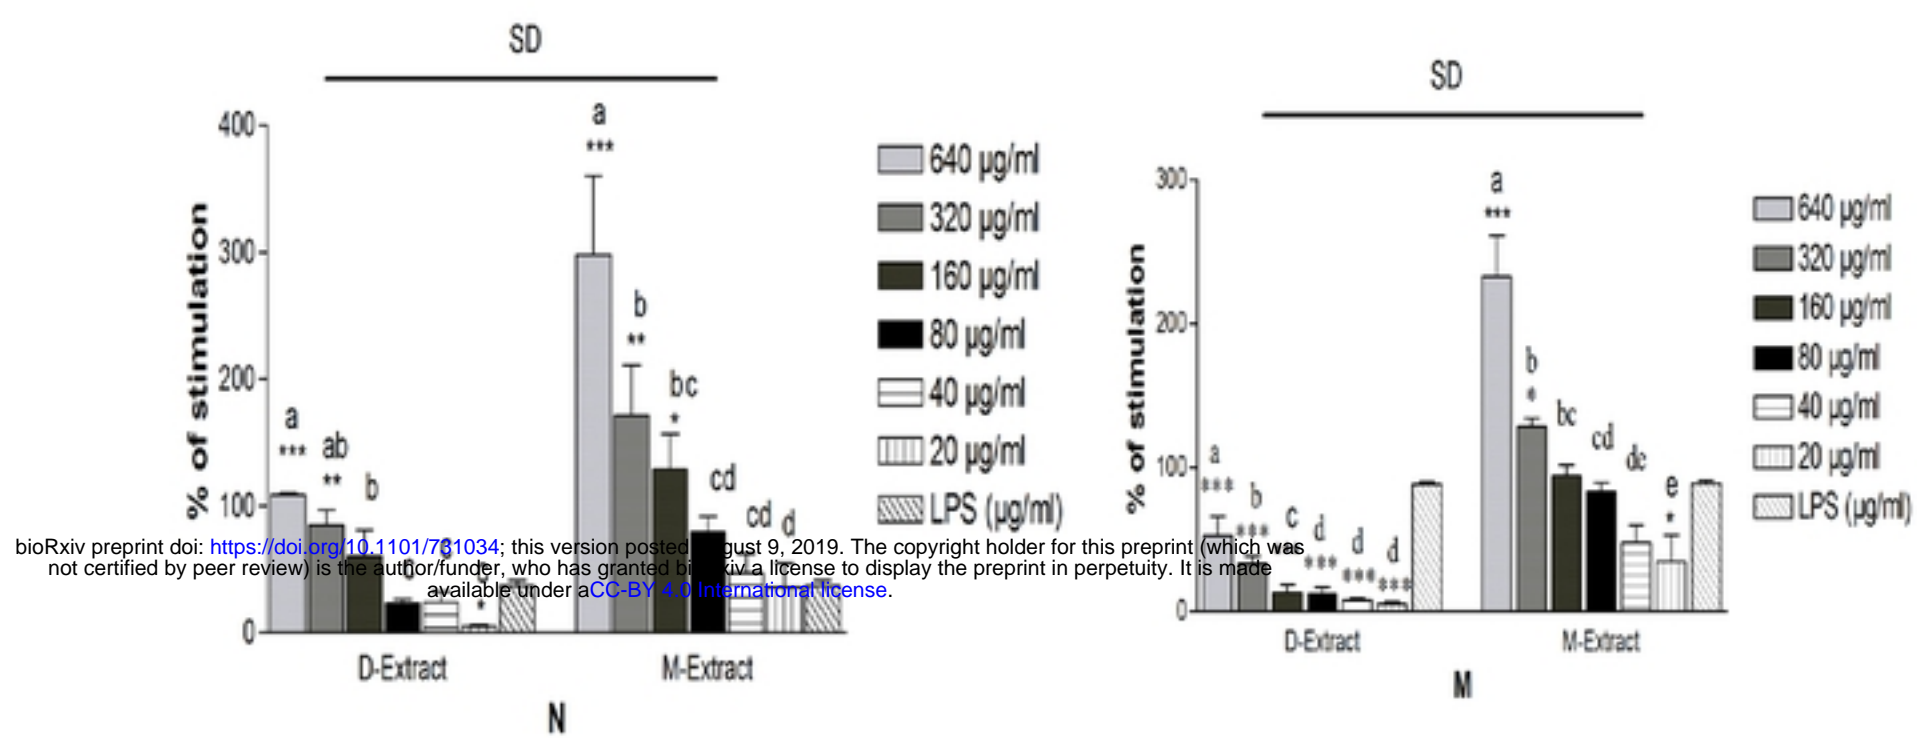

**Fig. 4.**

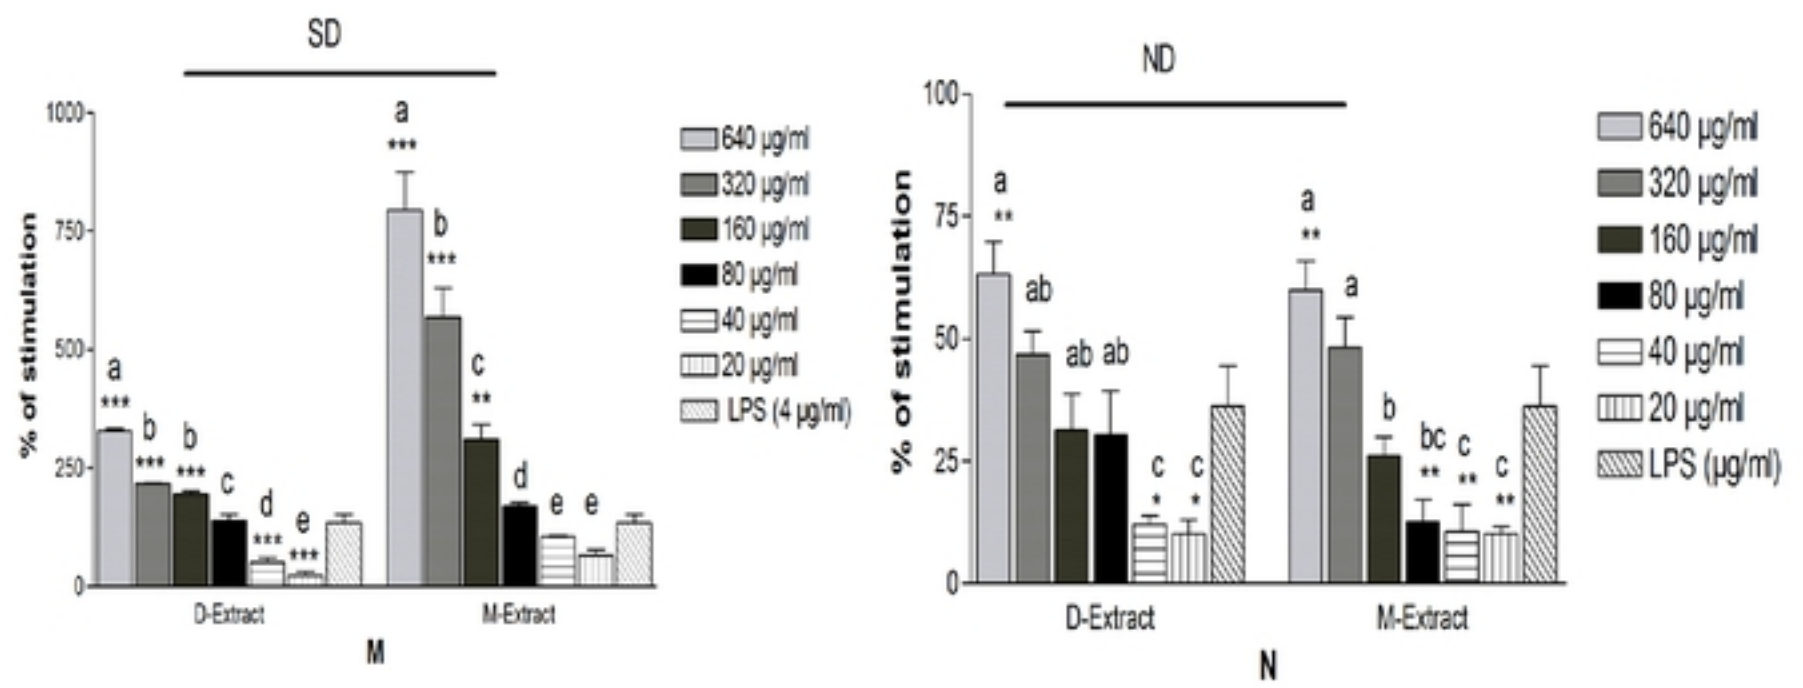

bioRxiv preprint doi: <https://doi.org/10.1101/731034>; this version posted August 9, 2019. The copyright holder for this preprint (which was not certified by peer review) is the author/funder, who has granted bioRxiv a license to display the preprint in perpetuity. It is made available under aCC-BY 4.0 International license.



**Fig.5.**

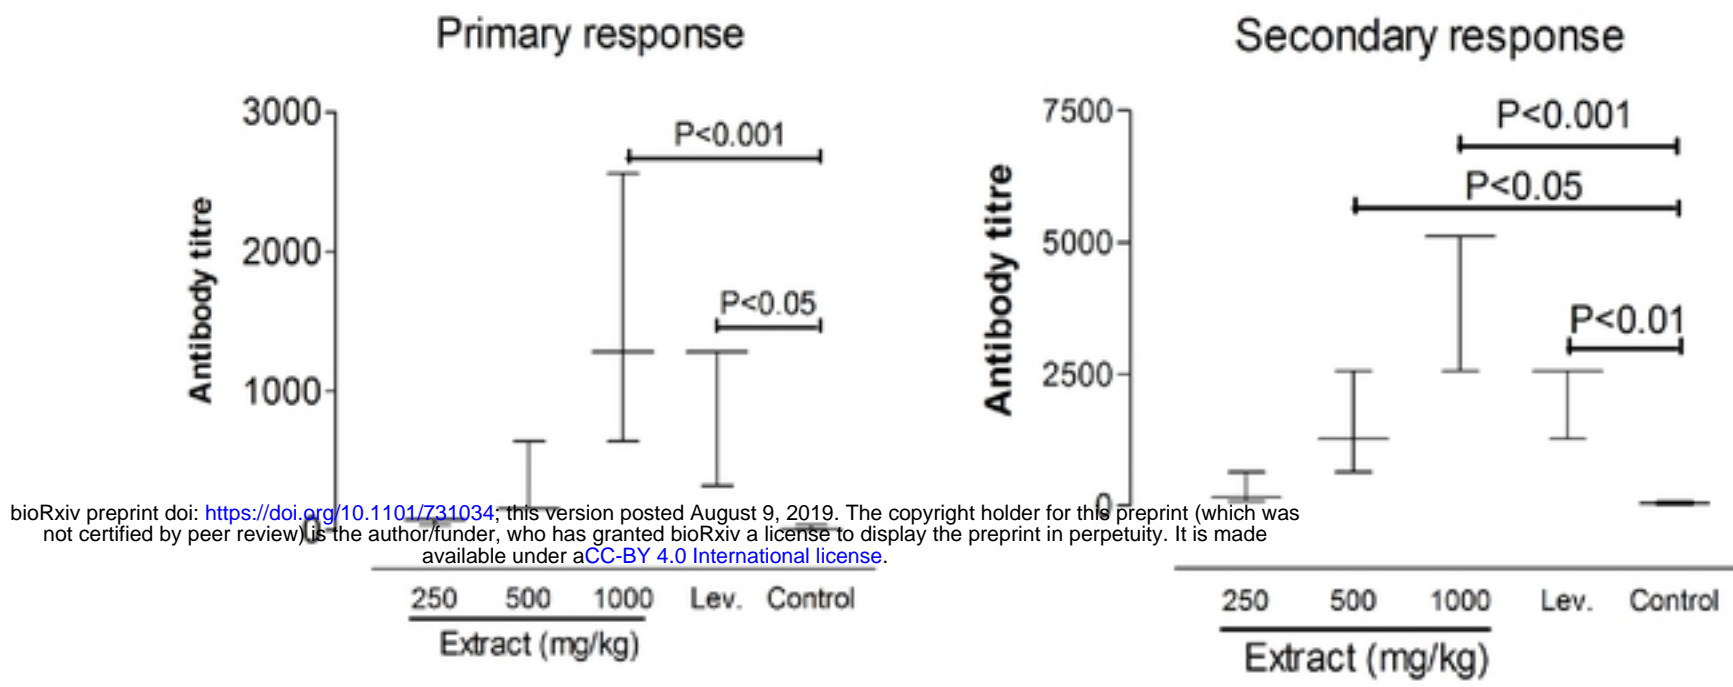

**Fig.6.**

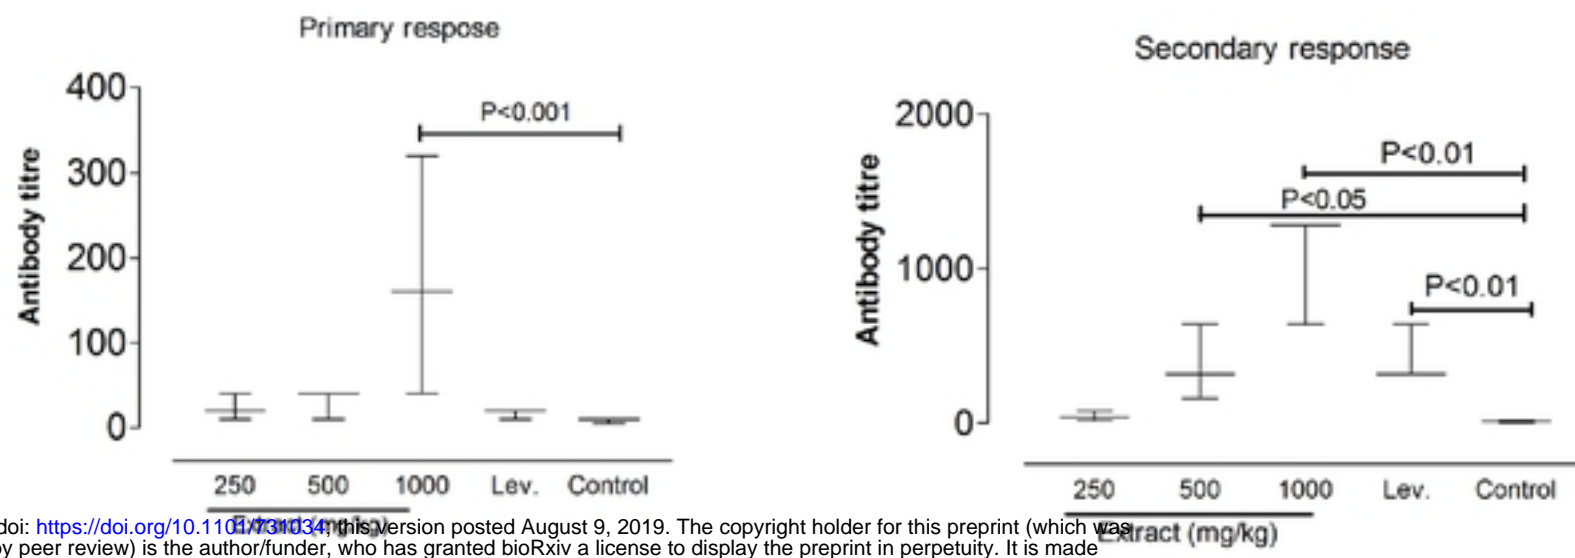

bioRxiv preprint doi: <https://doi.org/10.1101/101034>; this version posted August 9, 2019. The copyright holder for this preprint (which was not certified by peer review) is the author/funder, who has granted bioRxiv a license to display the preprint in perpetuity. It is made available under aCC-BY 4.0 International license.

Fig.7.

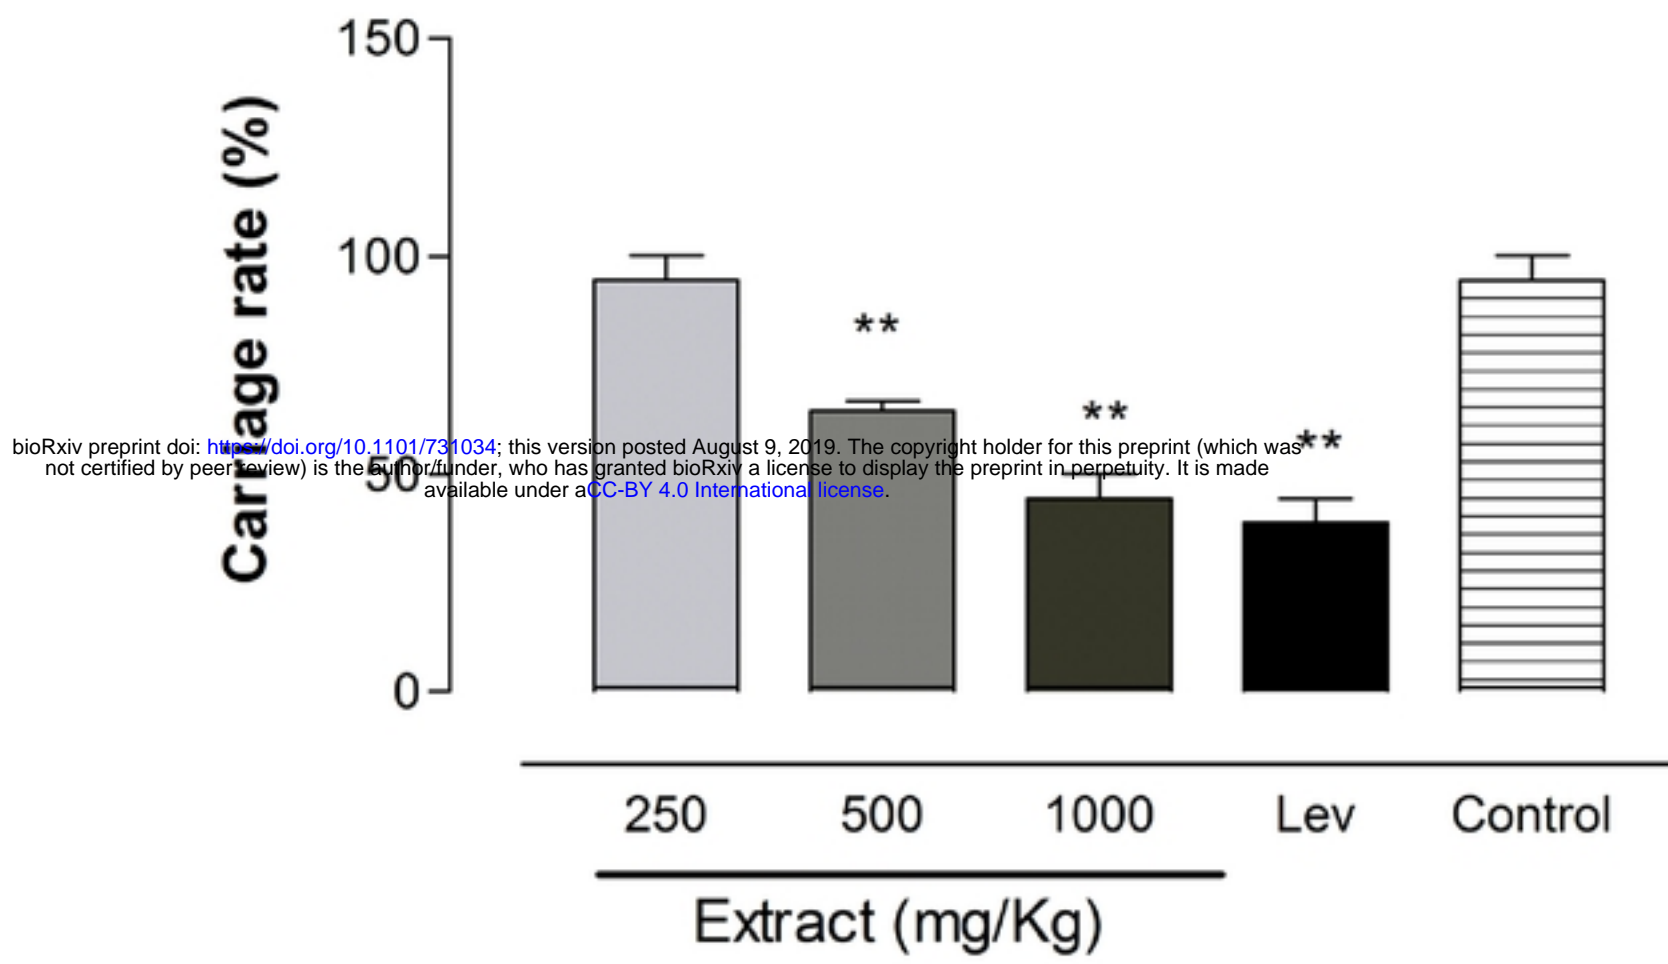

Source: https://www.biorxiv.org/content/10.1101/731034v1.full.pdf
